# Supplementary material for: Prognostic parameterization of cloud ice with a single category in the aerosol-climate model ECHAM(v6.3.0)-HAM(v2.3)
Source: Copernicus journal article supplement (doi:10.5194/gmd-11-1557-2018), 2018-04-18
Supplement: Supplementary file 1 [file gmd-11-1557-2018-supplement.zip]

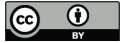

## *Supplement of*

# **Prognostic parameterization of cloud ice with a single category in the aerosol-climate model ECHAM(v6.3.0)-HAM(v2.3)**

**Remo Dietlicher et al.**

*Correspondence to:* Remo Dietlicher ([remo.dietlicher@env.ethz.ch](mailto:remo.dietlicher@env.ethz.ch))

- [gmd-11-1557-2018-supplement-title-page.pdf](#)
- [r4813](#)
  - README
  - README
  - nocirrus\_2m.nc
  - nocirrus\_2m\_nf.nc
  - nocirrus\_2m\_nf\_pl.nc
  - nocirrus\_2m\_ns.nc
  - nocirrus\_2m\_ns\_pl.nc
  - nocirrus\_2m\_pl.nc
  - nocirrus\_p3.nc
  - nocirrus\_p32m.nc
  - nocirrus\_p32m\_pl.nc
  - nocirrus\_p3\_pl.nc
  - nofreezing\_2m.nc
  - nofreezing\_2m\_pl.nc
  - nofreezing\_p3.nc
  - nofreezing\_p32m.nc
  - nofreezing\_p32m\_pl.nc
  - nofreezing\_p3\_pl.nc
  - numerics
    - \* numerics\_100.nc
    - \* numerics\_100\_pl.nc
    - \* numerics\_100\_timer.txt
    - \* numerics\_expl\_1.nc

- \* numerics\_expl\_1\_pl.nc
- \* numerics\_expl\_1\_timer.txt
- \* numerics\_expl\_2.nc
- \* numerics\_expl\_2\_pl.nc
- \* numerics\_expl\_2\_timer.txt
- \* numerics\_expl\_3.nc
- \* numerics\_expl\_3\_pl.nc
- \* numerics\_expl\_3\_timer.txt
- \* numerics\_expl\_4.nc
- \* numerics\_expl\_4\_pl.nc
- \* numerics\_expl\_4\_timer.txt
- \* numerics\_fl.nc
- \* numerics\_fl\_pl.nc
- \* numerics\_fl\_prct00.nc
- \* numerics\_fl\_prct00\_pl.nc
- \* numerics\_fl\_prct00\_timer.txt
- \* numerics\_fl\_prct10.nc
- \* numerics\_fl\_prct100.nc
- \* numerics\_fl\_prct100\_pl.nc
- \* numerics\_fl\_prct100\_timer.txt
- \* numerics\_fl\_prct10\_pl.nc
- \* numerics\_fl\_prct10\_timer.txt
- \* numerics\_fl\_prct20.nc
- \* numerics\_fl\_prct20\_pl.nc
- \* numerics\_fl\_prct20\_timer.txt
- \* numerics\_fl\_prct30.nc
- \* numerics\_fl\_prct30\_pl.nc
- \* numerics\_fl\_prct30\_timer.txt
- \* numerics\_fl\_prct40.nc
- \* numerics\_fl\_prct40\_pl.nc
- \* numerics\_fl\_prct40\_timer.txt
- \* numerics\_fl\_prct50.nc
- \* numerics\_fl\_prct50\_pl.nc
- \* numerics\_fl\_prct50\_timer.txt
- \* numerics\_fl\_prct60.nc
- \* numerics\_fl\_prct60\_pl.nc
- \* numerics\_fl\_prct60\_timer.txt
- \* numerics\_fl\_prct70.nc
- \* numerics\_fl\_prct70\_pl.nc
- \* numerics\_fl\_prct70\_timer.txt
- \* numerics\_fl\_prct80.nc
- \* numerics\_fl\_prct80\_pl.nc
- \* numerics\_fl\_prct80\_timer.txt
- \* numerics\_fl\_prct90.nc
- \* numerics\_fl\_prct90\_pl.nc
- \* numerics\_fl\_prct90\_timer.txt
- \* numerics\_fl\_timer.txt

- \* numerics\_impl\_1.nc
- \* numerics\_impl\_1\_pl.nc
- \* numerics\_impl\_1\_timer.txt
- \* numerics\_impl\_2.nc
- \* numerics\_impl\_2\_pl.nc
- \* numerics\_impl\_2\_timer.txt
- \* numerics\_impl\_3.nc
- \* numerics\_impl\_3\_pl.nc
- \* numerics\_impl\_3\_timer.txt
- \* numerics\_impl\_4.nc
- \* numerics\_impl\_4\_pl.nc
- \* numerics\_impl\_4\_timer.txt
- \* numerics\_in.nc
- \* numerics\_in\_pl.nc
- \* numerics\_in\_timer.txt
- \* numerics\_no.nc
- \* numerics\_no\_pl.nc
- \* numerics\_no\_timer.txt
- \* numerics\_out.nc
- \* numerics\_out\_pl.nc
- \* numerics\_out\_timer.txt
- \* numerics\_t6.nc
- \* numerics\_t6\_pl.nc
- \* numerics\_t6\_timer.txt
- \* sed\_submlt.nc

– rain

- \* warm\_nmicro1.nc
- \* warm\_nmicro10.nc
- \* warm\_nmicro100.nc
- \* warm\_nmicro100\_1000nc.nc
- \* warm\_nmicro100\_100nc.nc
- \* warm\_nmicro100\_200nc.nc
- \* warm\_nmicro100\_300nc.nc
- \* warm\_nmicro100\_400nc.nc
- \* warm\_nmicro100\_500nc.nc
- \* warm\_nmicro100\_50nc.nc
- \* warm\_nmicro1\_1000nc.nc
- \* warm\_nmicro1\_100nc.nc
- \* warm\_nmicro1\_200nc.nc
- \* warm\_nmicro1\_300nc.nc
- \* warm\_nmicro1\_400nc.nc
- \* warm\_nmicro1\_500nc.nc
- \* warm\_nmicro1\_50nc.nc
- \* warm\_nmicro2.nc
- \* warm\_nmicro3.nc
- \* warm\_nmicro4.nc
- \* warm\_nmicro5.nc

- \* warm\_nmicro50.nc
- \* warm\_nmicrohq\_1000nc.nc
- \* warm\_nmicrohq\_100nc.nc
- \* warm\_nmicrohq\_200nc.nc
- \* warm\_nmicrohq\_300nc.nc
- \* warm\_nmicrohq\_400nc.nc
- \* warm\_nmicrohq\_500nc.nc
- \* warm\_nmicrohq\_50nc.nc
- reference\_2m.nc
- reference\_2m\_pl.nc
- reference\_p3.nc
- reference\_p32m.nc
- reference\_p32m\_pl.nc
- reference\_p3\_pl.nc
- reference\_trunk.nc
- reference\_trunk\_pl.nc
- stdatm\_form\_diss.nc

The copyright of individual parts of the supplement might differ from the CC BY 4.0 License.
